# Supplementary material
Source: MDPI journal article supplement (https://www.mdpi.com/2227-7102/12/7/449)
Supplement: s1 [file s1 › education-1768827-supplementary.pdf]

*Supplemental Material S1. The survey questionnaire about the constraints in complying the tasks associated with the printed modular learning materials for BEED and BSED students of North Eastern Mindanao State University*

### **Brief Survey Questionnaire**

This survey questionnaire is administered as part of the study of Dr. Ermelyn M. Bustillo of Surigao del Sur State College (main campus) on the *Interview About the Constraints in Complying with the Submission of Module Materials in the Education Program of the Department of Education, North Eastern Mindanao State University*.

Please respond to the following questions by placing a check or tick mark (/) that corresponds to your response and/or fill in the blank where indicated.

#### **Part 1. Personal**

Name \_\_\_\_\_

Address:

House Number/Purok: \_\_\_\_\_

Barangay : \_\_\_\_\_

Municipality: \_\_\_\_\_

Province: \_\_\_\_\_

Education Program:    \_\_\_BSED        \_\_\_BEED

Sex :    \_\_\_Male                    \_\_\_Female        \_\_\_Transgender Female    \_\_\_Transgender Male  
         \_\_\_Gender Variant/Con-Conforming        \_\_\_Not listed        \_\_\_Prefer not to answer

Educational level: \_\_\_1<sup>st</sup> year   \_\_\_2<sup>nd</sup> year   \_\_\_3<sup>rd</sup> year   \_\_\_4<sup>th</sup> year   \_\_\_others, please specify

#### **Part 2. Constraints in Complying with the tasks contained in the printed modular learning materials**

1. Have you complied with the assigned tasks in the modular materials delivered during the 16 – 31 August 2021 cycle?

      \_\_\_YES                \_\_\_NO

*If YES, please proceed to question number 2. If NO, please proceed to question number 3.*

2. Have you encountered any difficulties in accomplishing your assigned tasks?

      \_\_\_YES                \_\_\_NO

*If YES, please tick any of the following or specify any reasons that were not on the list*

\_\_\_ Poor internet connectivity

\_\_\_ Inadequate learning resources

\_\_\_ Difficulty understanding the modular material and assessment instructions

\_\_\_ Overloaded remote learning tasks

\_\_\_ Poor learning environment

\_\_\_ Mental health problems

\_\_\_ Others, please specify \_\_\_\_\_

3. Why you were not able to accomplish your assigned tasks?

*Please tick any of the following or specify any reasons that were not on the list*

- ☐ No internet or slow/unstable internet access
- ☐ Frequent power interruptions
- ☐ Inadequate resources to support remote learning process (e.g. no computers, printers, etc.)
- ☐ Vague instructions in the learning materials provided
- ☐ Insufficient support and channels to communicate (e.g. with peers, teachers, etc.)
- ☐ Too many household chores/farm works
- ☐ Communications costs
- ☐ Overloaded with many remote learning tasks one instructor after another
- ☐ Poor learning environment
- ☐ Difficulty coping up with COVID pandemic condition/mental health issues
- ☐ Others, please specify \_\_\_\_\_

4. Is there anything more you want to complain about relative to accomplishing your assigned tasks in the printed modular materials?

*Please specify* \_\_\_\_\_

Thank you for your time.

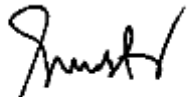

**Dr. Ermelyn Bustillo**

North Eastern Mindanao University, Philippines  
ermelynustillo@gmail.com
